# Supplementary material for: Preventive Impact of Long-Term Ingestion of Chestnut Honey on Glucose Disorders and Neurodegeneration in Obese Mice
Source: MDPI journal article supplement (doi:10.3390/nu14040756), 2022-02-11
Supplement: s1 [file s1]

**Table S1.** Composition and energy densities of STD and HFD .

| <b>Ingredient (g/kg)</b>      | <b>STD</b> | <b>HFD</b> |
|-------------------------------|------------|------------|
| Acid Casein 741               | 200        | 265.00     |
| L-Cystine                     | 2.8        | 4          |
| Maltodextrine-0032            | 33.2       | 160        |
| Sucrose                       | 300        | 90         |
| Cellulose (Arbocel)           | 50         | 65.5       |
| Soybean oil                   | 25         | 30         |
| Lard                          | 19         | 220        |
| Vitamin mix AIN-93-VX-PF2439  | 10         | 21         |
| Mineral mix AIN-93G-MX-PF2348 | 45         | 48         |
| Choline bitartrate            | 1.9        | 3          |
| Calcium Phosphate dibasic     | 13         | 3.4        |
| Pistachio                     | -          | -          |
| Total Energy, Kcal/g          | 3.5        | 6          |
| Protein, %                    | 20         | 20         |
| Carbohydrate, %               | 70         | 20         |
| Fat, %                        | 10         | 60         |

Abbreviations are: STD, Standard diet. HFD, high fat diet. This study used 4RF25, PF4051/D and PF4215/C-R&S34/16 diets (Mucedola s.r.l.) as STD and HFD respectively. Composition of these diets is from the Mucedola Web site.
