# Supplementary material for: Preventive Impact of Long-Term Ingestion of Chestnut Honey on Glucose Disorders and Neurodegeneration in Obese Mice
Source: MDPI journal article supplement (doi:10.3390/nu14040756), 2022-02-11
Supplement: s1 [file s1]

## Supplementary data

**Table S2.** Composition of Sicilian black bee chestnut honey

| <b>Honey Chestnut Components</b> | <b>g/100g</b>  |
|----------------------------------|----------------|
| D(+)-Maltose                     | 2.44           |
| Glucose                          | 21.00          |
| D(-)-Fructose                    | 33.00          |
| D-Threulose                      | 1.03           |
| D-Apiose                         | 3.35           |
| Sucrose                          | 1.53           |
| <b>Phenolic compounds</b>        | <b>µg/100g</b> |
| Apigenin                         | 378.7          |
| Kaempferol                       | 7545           |
| Quercetin                        | 7184           |
| Rutin                            | 71.02          |
| Myricetin                        | 1871           |
| Hesperidin                       | 17.07          |
| Naringenin                       | 103.2          |
| Pinocembrin                      | 1549           |
| Caffeic acid                     | 416.2          |
| Ferulic acid                     | 66.38          |
| Gallic acid                      | 85.66          |
| Syringic acid                    | 9.97           |
| Vanillic acid                    | 230.0          |
| Catechin                         | nd             |
| Epicatechin                      | nd             |
| Apigenin                         | 378.7          |
| Kaempferol                       | 7545           |
| Quercetin                        | 7184           |
